# Supplementary material
Source: publisher figshare collection journal article supplement (https://frontiersin.figshare.com/ndownloader/files/15321842)

**Supplementary Figure 4.** Overview of variable proteins at stages E, S1 and S2 based on their correspondent metabolic pathways. Each square corresponds to a protein. Blue and red indicate lower and higher expression in mesocarp than in endocarp, respectively, in a log2 basis. Scale bar is at the top right of each figure. Images were generated using MapMan program (Usadel et al., 2009).

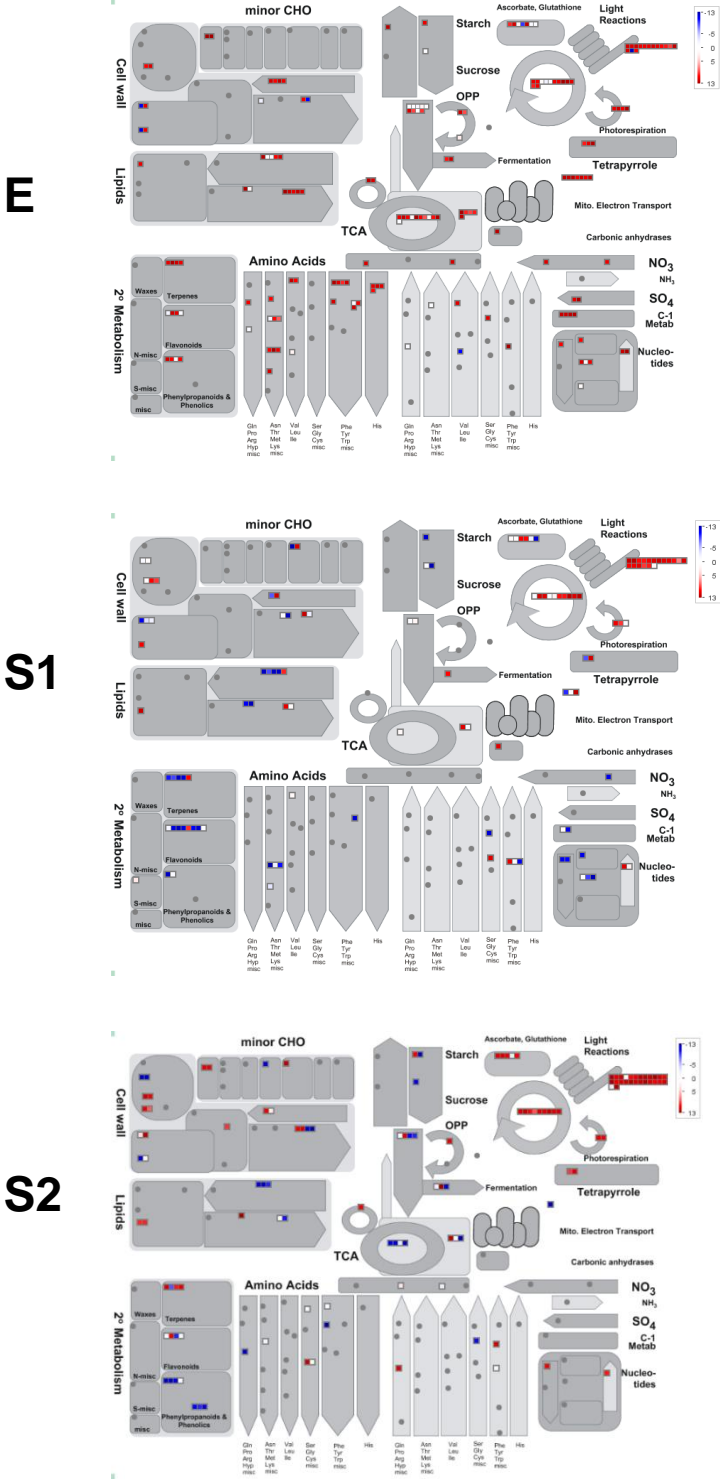

Supplement: Supplementary file [file 15321842]
